# Supplementary material
Source: Royal Society of Chemistry journal article supplement (doi:10.1039/d6sm00007j)
Supplement: d6sm00007j1.pdf [file d6sm00007j1.pdf]

## Supporting information

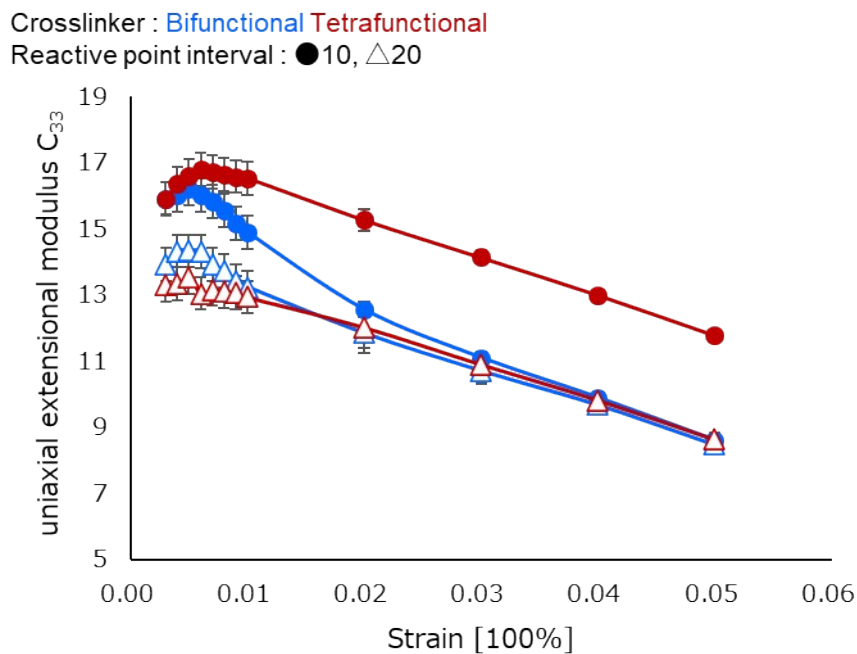

SI.1. Benchmark analysis of the uniaxial extensional modulus  $C_{33}$  calculated using different upper strain limits ( $\epsilon_{zz} = 0.05, 0.04, 0.03, 0.02, 0.01, 0.009, 0.008, 0.007, 0.006, 0.005, 0.004,$  and  $0.003$ ).

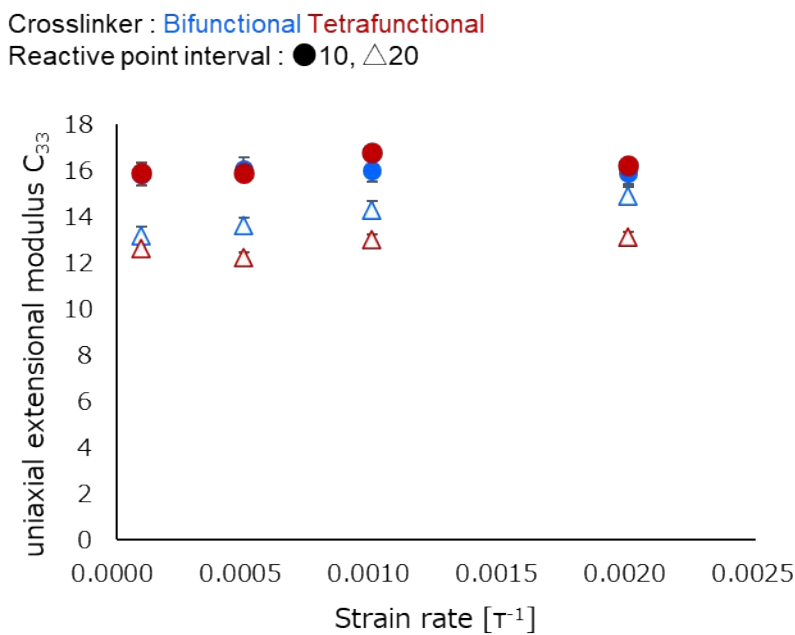

SI.2. Strain-rate dependence of the uniaxial extensional modulus  $C_{33}$ . Benchmark simulations

were performed at strain rates of  $1.0 \times 10^{-4} \tau^{-1}$ ,  $5.0 \times 10^{-4} \tau^{-1}$ ,  $1.0 \times 10^{-3} \tau^{-1}$ , and  $2.0 \times 10^{-3} \tau^{-1}$ .  
the effective chain ratio and strand length uniformity.
